# Supplementary material for: A new class of “electro-acid/base”-induced reversible methyl ketone colour switches
Source: Royal Society of Chemistry journal article supplement (doi:10.1039/c3tc30769g), 2013-01-01
Supplement: c3tc30769g.pdf [file c3tc30769g.pdf]

## Supporting information

# New Class of “Electro-acid/base” Induced Reversible Methyl Ketone Colour Switches

Yumo Zhang,<sup>a</sup> Minjie Li,<sup>\*a</sup> Wen Li,<sup>a</sup> Zhiyuan Huang,<sup>a</sup> Shaoyin Zhu,<sup>a</sup> Bing Yang,<sup>a</sup>  
Xiao-Chun Wang,<sup>b</sup> and Sean Xiao-An Zhang\*,<sup>a</sup>

<sup>a</sup> State Key Laboratory of Supramolecular Structure and Materials, College of Chemistry, Jilin University, Changchun, Jilin 130012 (China)

<sup>b</sup> Institute of Atomic and Molecular Physics, Jilin University, Changchun, Jilin 130012 (China)

## Table of Contents

### 1. Experimental details

#### 1.1 Materials

#### 1.2 Characterization of Synthesis

### 2. Characterization of mechanism for M1

**Figure S1.** Cyclic voltammograms of **M9** and **M10**.

**Figure S2.** <sup>1</sup>H NMR spectra of **M1** stimulated by base and acid.

**Figure S3.** <sup>1</sup>H NMR spectra of **M8** in CDCl<sub>3</sub>.

**Figure S4.** GC analysis of the sample of cathode of H-type electrolytic cell.

**Figure S5.** The electron paramagnetic resonance spectrum (EPR) of **M1**.

**Figure S6.** Absorption of **M6** and nitrobenzene change with cyclic voltammogram.

**Figure S7.** Absorption of **M7** and nitrobenzene change with cyclic voltammogram.

**Figure S8.** Cyclic voltammogram (CV) of the liquid device of **M1**.

**Figure S9.** Cyclic voltammogram (CV) of the solid device of **M1**.

**Figure S10.** Absorption spectra of **M1** stimulated by impulse voltage.

### 3. Absorption spectra and cyclic voltammogram of M2 - M7

**Figure S11.** Absorption spectra and cyclic voltammogram of **M2** stimulated by electric field and base.

**Figure S12.** Absorption spectra and cyclic voltammogram of **M3** stimulated by electric field and base.

**Figure S13.** Absorption spectra and cyclic voltammogram of **M4** stimulated by

electric field and base.

**Figure S14.** Absorption spectra and cyclic voltammogram of **M5** stimulated by electric field and base.

**Figure S15.** Absorption spectra of **M6** and nitrobenzene mixture solution stimulated by electric field and base.

**Figure S16.** Absorption spectra of **M7** and nitrobenzene mixture solution stimulated by electric field and base.

**Figure S17.** Schematic depiction of an adiabatic intermolecular proton transfer reaction.

**Figure S18.** Illustration of in-situ spectroelectrochemical characterization.

**Figure S19.** Illustration of the ITO cells of liquid film.

**Figure S20.** Illustration of the ITO cells of PMMA film.

#### **4. $^1\text{H}$ NMR and $^{13}\text{C}$ NMR of M1 - M8**

## 1. Experimental details

### 1.1 Materials

Fluorene, 2-(4-nitrophenyl)acetic acid and 2-(2-nitrophenyl)acetic acid were purchased from Aldrich. 2-(4-(trifluoromethyl)phenyl)acetic acid, 2-(4-(methylsulfonyl)phenyl)acetic acid, ethylene glycol, benzene, anisole, ferrocene, and tetrabutylammonium hexafluorophosphate (TBAPF<sub>6</sub>) were purchased from Aladdin. TBAPF<sub>6</sub> was recrystallized three times from ethanol and dried under vacuum at 50 °C. Acetonitrile was distilled from CaH<sub>2</sub> under nitrogen prior to use. Other chemicals were used as received except for those mentioned.

### 1.2 Characterization of Synthesis

**2-(4-nitrophenyl)-1-phenylethanone (M1).** A pale yellow solid, yield (85 %). <sup>1</sup>H NMR (300 MHz, CDCl<sub>3</sub>): δ=8.21 (d, *J* = 8.8 Hz, 2H), 8.02 (d, *J* = 7.1 Hz, 2H), 7.62 (t, *J* = 7.4 Hz, 1H), 7.51 (t, *J* = 7.7 Hz, 2H), 7.44 (d, *J* = 8.8 Hz, 2H), 4.42 (s, 2H). <sup>13</sup>C NMR (75 MHz, CDCl<sub>3</sub>): δ=195.91, 146.99, 142.01, 136.09, 133.65, 130.58, 128.80, 128.35, 123.64, 44.85. LC-HRMS: calcd for C<sub>14</sub>H<sub>12</sub>NO<sub>3</sub> 242.0812, found 242.0805. m.p.: 141.3-142.0 °C.

**1-(4-methoxyphenyl)-2-(4-nitrophenyl)ethanone (M2).** A pale yellow solid, yield (86 %). <sup>1</sup>H NMR (300 MHz, CDCl<sub>3</sub>): δ=8.20 (d, *J* = 8.8 Hz, 2H), 7.99 (d, *J* = 9.0 Hz, 2H), 7.43 (d, *J* = 8.8 Hz, 2H), 6.96 (d, *J* = 9.0 Hz, 2H), 4.36 (s, 2H), 3.89 (s, 3H). <sup>13</sup>C NMR (75 MHz, CDCl<sub>3</sub>): δ=194.59, 164.08, 146.99, 142.63, 130.92, 130.68, 129.30, 123.81, 114.14, 55.67, 44.77. LC-HRMS: calcd for C<sub>15</sub>H<sub>14</sub>NO<sub>4</sub> 272.0917, found 272.0913. m.p.: 112.2-113.0 °C.

**1-(9,9-dihexyl-9H-fluoren-2-yl)-2-(4-nitrophenyl)ethanone (M3).** A pale yellow solid, yield (80 %). <sup>1</sup>H NMR (300 MHz, CDCl<sub>3</sub>): δ = 8.22 (d, *J*=8.3, 2H), 8.01 (d, *J*=8.0, 1H), 7.98 (s, 1H), 7.78 (d, *J*=7.8, 2H), 7.48 (d, *J*=8.4, 2H), 7.38 (s, 3H), 4.47 (s, 2H), 1.99 (t, *J*=8.2, 4H), 1.15–0.93 (m, 12H), 0.75 (t, *J*=7.2, 6H), 0.56 (m, 4H). <sup>13</sup>C NMR (75 MHz, CDCl<sub>3</sub>): δ=195.91, 152.11, 151.41, 147.08, 146.82, 142.62, 139.57, 134.78, 130.75, 128.81, 128.21, 127.21, 123.77, 123.20, 122.81, 120.94, 119.78, 55.42, 45.24, 40.25, 31.54, 29.68, 23.82, 22.61, 14.05. LC-HRMS: m/z calc. for C<sub>33</sub>H<sub>44</sub>NO<sub>3</sub> 498.3003, found 498.2996. m.p.: 85.6-86.6 °C.

**2-(4-nitrophenyl)-1-p-tolyethanone (M4).** A pale yellow solid, yield (68 %). <sup>1</sup>H NMR (300 MHz, CDCl<sub>3</sub>): δ=8.19 (d, *J* = 8.8 Hz, 2H), 7.90 (d, *J* = 8.3 Hz, 2H), 7.42 (d, *J* = 8.8 Hz, 2H), 7.29 (d, *J* = 7.9 Hz, 2H), 4.38 (s, 2H), 2.42 (s, 3H). <sup>13</sup>C NMR (75 MHz, CDCl<sub>3</sub>): δ=195.71, 147.09, 144.79, 142.43, 133.80, 130.71, 129.64, 128.67, 123.78, 44.93, 21.78. LC-HRMS: calcd for C<sub>15</sub>H<sub>14</sub>NO<sub>3</sub> 256.0974, found 256.0968. m.p.: 111.8-112.2 °C.

**1-(4-methoxyphenyl)-2-(2-nitrophenyl)ethanone (M5).** A pale yellow solid, yield (85 %). <sup>1</sup>H NMR (300 MHz, CDCl<sub>3</sub>): δ=8.14 (dd, *J* = 8.1, 1.3 Hz, 1H), 8.02 (d, *J* = 8.9 Hz, 2H), 7.61 (td, *J* = 7.5, 1.4 Hz, 1H), 7.52 – 7.42 (m, 1H), 7.35 (dd, *J* = 7.6, 1.4 Hz, 1H), 6.98 (d, *J* = 8.9 Hz, 2H), 4.69 (s, 2H), 3.89 (s, 3H). <sup>13</sup>C NMR (75 MHz, CDCl<sub>3</sub>, ppm): δ=193.72, 163.71, 149.08, 133.56, 133.34, 130.84, 130.46, 129.42, 128.17, 125.06, 113.81, 55.45, 43.61. LC-HRMS: calcd for C<sub>15</sub>H<sub>14</sub>NO<sub>4</sub> 272.0917, found 272.0915. m.p.: 114.3-115.5 °C.

**1-(4-methoxyphenyl)-2-(4-(methylsulfonyl)phenyl)ethanone (M6).** A pale yellow solid, yield (50 %). <sup>1</sup>H NMR (300 MHz, CDCl<sub>3</sub>): δ=7.99 (d, *J* = 8.8 Hz, 2H), 7.18 (d, *J* = 8.5 Hz, 2H), 6.92 (d, *J* = 8.8 Hz, 2H), 6.86 (d, *J* = 8.7 Hz, 2H), 4.17 (s, 2H), 3.86 (s, 3H), 3.78 (s, 3H). <sup>13</sup>C NMR (75

MHz, CDCl<sub>3</sub>):  $\delta$ =194.90, 164.09, 141.48, 139.20, 130.97, 130.79, 129.34, 127.78, 114.17, 55.70, 44.90, 44.72. LC-HRMS: calcd for C<sub>16</sub>H<sub>17</sub>O<sub>4</sub>S 305.0848, found 305.0842. m.p.: 175.5-176.2 °C.

**1-(4-methoxyphenyl)-2-(4-(trifluoromethyl)phenyl)ethanone (M7)** A pale yellow solid, yield (90 %). <sup>1</sup>H NMR (300 MHz, CDCl<sub>3</sub>):  $\delta$ =7.99 (d, *J* = 8.9 Hz, 2H), 7.58 (d, *J* = 8.2 Hz, 2H), 7.38 (d, *J* = 8.1 Hz, 2H), 6.95 (d, *J* = 8.9 Hz, 2H), 4.30 (s, 2H), 3.87 (s, 3H). <sup>13</sup>C NMR (75 MHz, CDCl<sub>3</sub>):  $\delta$ =194.89, 163.52, 138.71, 132.43, 131.29, 130.55, 129.62, 129.07, 128.80, 128.60, 128.17, 127.78, 125.73, 125.25, 125.20, 125.16, 125.10, 122.12, 114.47, 113.89, 113.65, 113.30, 113.09, 55.20, 44.47. LC-HRMS: calcd for C<sub>16</sub>H<sub>14</sub>F<sub>3</sub>O<sub>2</sub> 295.0940, found 295.0941. m.p.: 137.0-137.8 °C.

**2-methyl-2-(4-nitrophenyl)-1-phenylpropan-1-one (M9)**. To an ice-cooled solution of M1 (241 mg, 1 mmol) in dry THF (10 mL) under an argon atmosphere was added *t*-BuOK (280 mg, 2.5 mmol), and the solution was stirred at room temperature for 1.5 h. Then CH<sub>3</sub>I (0.156 ml, 2.5 mmol) was added. The reaction mixture was stirred for a further 4 h. KI was then removed by filtration, and concentrated in vacuum. The product was separated by column chromatography using petroleum ether and ethyl acetate (v:v=20:1) as eluent. A pale yellow solid, yield (230 mg, 85%). <sup>1</sup>H NMR (300 MHz, CDCl<sub>3</sub>):  $\delta$ =8.22 (d, *J* = 8.9 Hz, 2H), 7.61 – 7.35 (m, 5H), 7.25 (t, *J* = 7.6 Hz, 2H), 1.66 (s, 6H). <sup>13</sup>C NMR (75 MHz, CDCl<sub>3</sub>, ppm):  $\delta$ =199.05, 148.61, 146.85, 135.79, 133.31, 128.68, 128.58, 124.06, 47.31, 19.25. LC-HRMS: calcd for C<sub>12</sub>H<sub>15</sub>NO<sub>3</sub> 270.1130, found 270.1128. m.p.: 85.1-86.2 °C.

**2-(4-nitrobenzyl)-2-phenyl-1,3-dioxolane (M10)**. A mixture of ethylene glycol (0.28 ml, 5 mmol), *p*-toluene sulphonic acid (0.017 g, 0.1 mmol), M1 (0.24 g, 1 mmol) and toluene (10 ml) was refluxed for 2 days using a Dean-Stark. After cooled, the solvent was removed by a rotary evaporator. The residue was dissolved in 200 ml of CH<sub>2</sub>Cl<sub>2</sub>, and washed with aqueous sodium carbonate. The combined organic layers were dried over MgSO<sub>4</sub>, filtered and concentrated in vacuum. The product was separated by column chromatography using petroleum ether and ethyl acetate (v:v=10:1) as eluent. A pale yellow solid, yield (90 %). <sup>1</sup>H NMR (300 MHz, CDCl<sub>3</sub>):  $\delta$ =8.06 (d, *J* = 10.5 Hz, 2H), 7.52 – 7.12 (m, 7H), 3.96 – 3.57 (m, 4H), 3.26 (s, 2H). <sup>13</sup>C NMR (75 MHz, CDCl<sub>3</sub>)  $\delta$ =146.48, 143.51, 141.46, 131.36, 127.89, 127.85, 125.38, 122.48, 109.08, 64.46, 46.48. LC-HRMS: calcd for C<sub>16</sub>H<sub>16</sub>NO<sub>4</sub> 286.1079, found 286.1073. m.p.: 119.0-119.9 °C.

**1,2-diphenylethanone (M11)**. A pale yellow solid, yield (95%). <sup>1</sup>H NMR (300 MHz, CDCl<sub>3</sub>):  $\delta$ =8.08 – 7.95 (m, 2H), 7.60 – 7.51 (m, 1H), 7.46 (tt, *J* = 6.7, 1.6 Hz, 2H), 7.37 – 7.21 (m, 5H), 4.29 (s, 2H). <sup>13</sup>C NMR (75 MHz, CDCl<sub>3</sub>):  $\delta$ =197.70, 136.70, 134.63, 133.23, 129.55, 128.75, 128.72, 128.69, 126.96, 45.58. LC-HRMS: calcd for C<sub>14</sub>H<sub>12</sub>O 196.0888, found 196.0894. m.p.: 87.3-88.1 °C.

## 2. Characterization of mechanism for M1

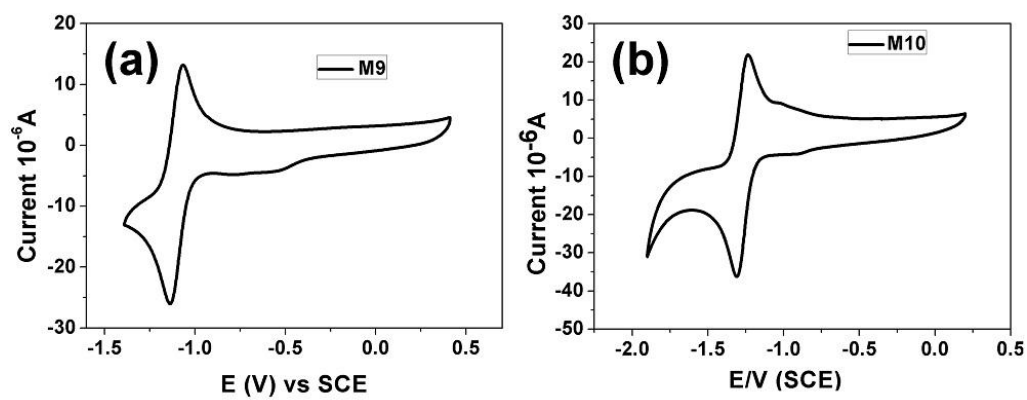

**Figure S1.** Cyclic voltammograms (CV) of **M9** ( $1.0 \times 10^{-3}$  M) (a) and **M10** ( $1.0 \times 10^{-3}$  M) (b) in acetonitrile containing TBAPF<sub>6</sub> (0.1 M). Scan rate: 100 mV/s.

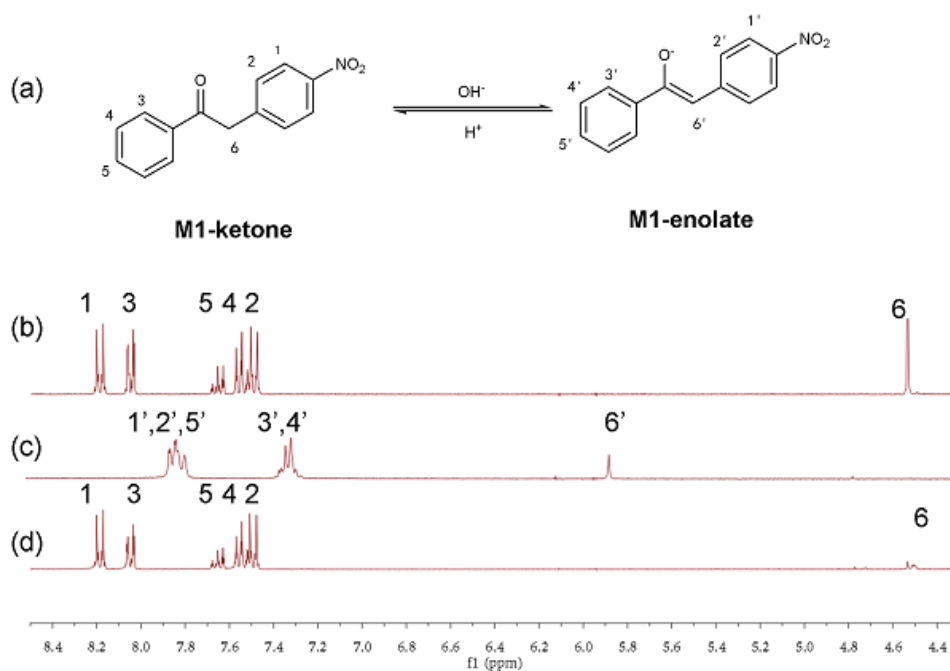

**Figure S2.**  $^1\text{H}$  NMR spectra of (a) **M1-ketone** in  $\text{CD}_3\text{CN}$ ; (b) **M1-enolate** obtained by adding 7 equiv of potassium tert-butoxide to **M1-ketone**; (c) **M1-ketone**, obtained by adding 7 equiv of  $\text{CF}_3\text{COOD}$  to **M1-enolate**. Due to deuterium exchange with  $\text{CD}_3\text{CN}$  solvent, the intensity for proton 6 decreases, and another broad peak appeared at 4.51 ppm assigned for the chemical shift of the proton 6 with one H deuterated.

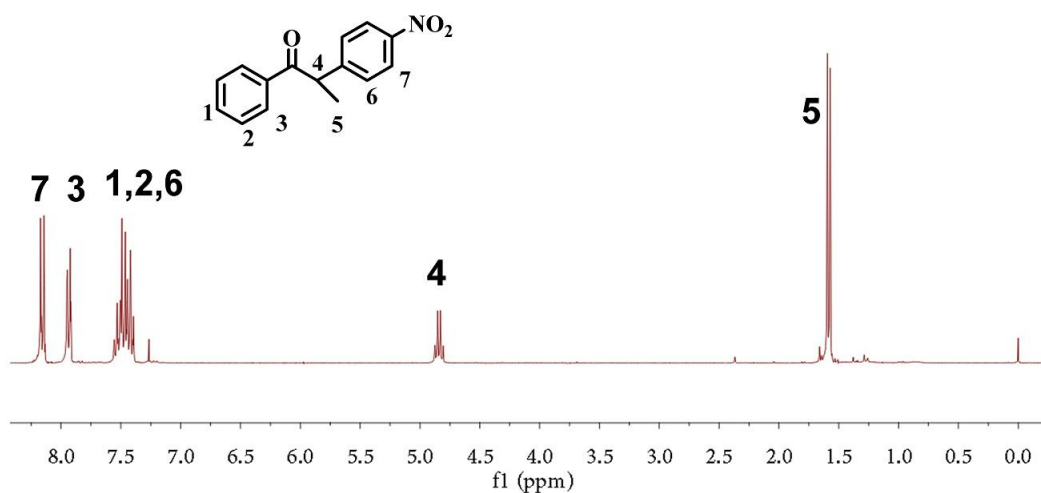

**Figure S3.** <sup>1</sup>H NMR spectra of M8 in CDCl<sub>3</sub>. **M8** was separated from the electrolyte of cathode of H<sup>-</sup>-type electrolytic cell by column chromatography using petroleum ether and ethyl acetate (v:v=20:1) as eluent. <sup>1</sup>H NMR (300 MHz, CDCl<sub>3</sub>) δ=8.22 – 8.11 (d, J = 8.8 Hz, 2H), 7.98 – 7.89 (d, J = 7.1 Hz, 2H), 7.57 – 7.34 (m, 5H), 4.84 (q, J = 6.9 Hz, 1H), 1.58 (d, J = 6.9 Hz, 3H).

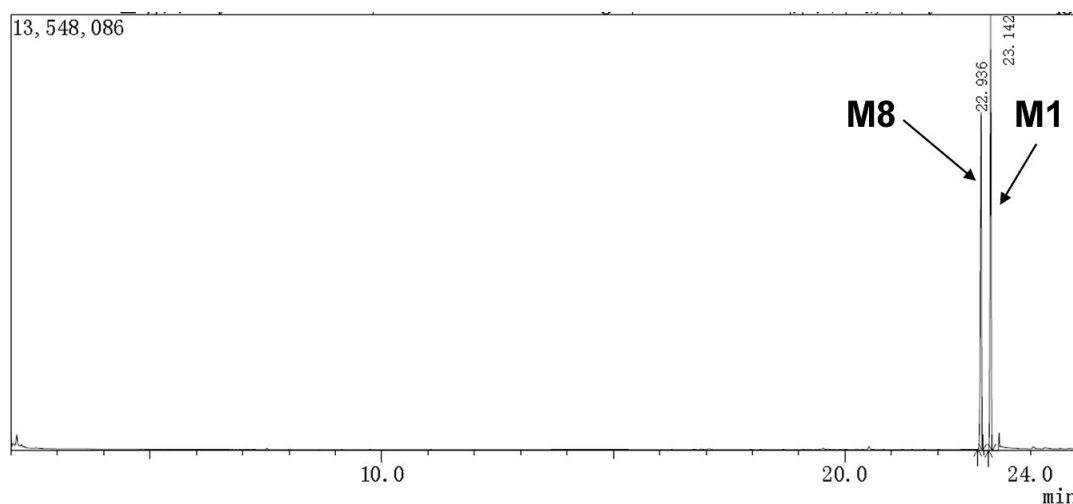

**Figure S4.** GC analysis of the sample of cathode of H-type electrolytic cell. This electrolytic cell was used for separating the electrolytic liquid from the anode and the cathode. The solvent of cathode was removed by a rotary evaporator. The residue was dissolved in 10 ml of ethyl acetate, and washed with aqueous. The combined organic layers afforded the sample.



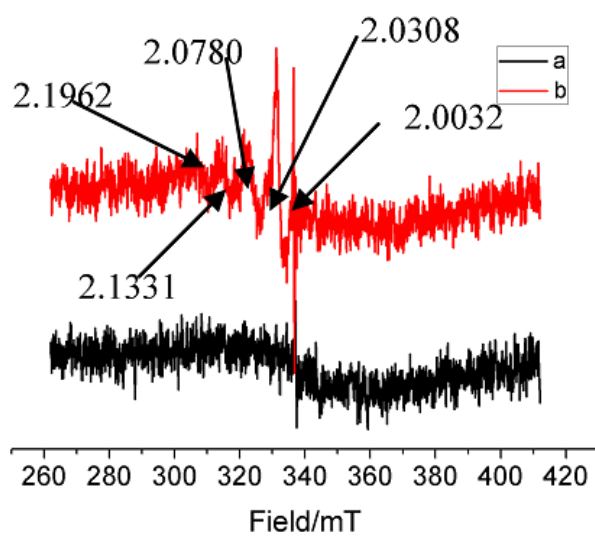

**Figure S5.** EPR spectrum of **M1** ( $1.0 \times 10^{-3}$  M) in acetonitrile containing TBAPF<sub>6</sub> (0.1 M) (curve a), under -1.18 V (curve b).

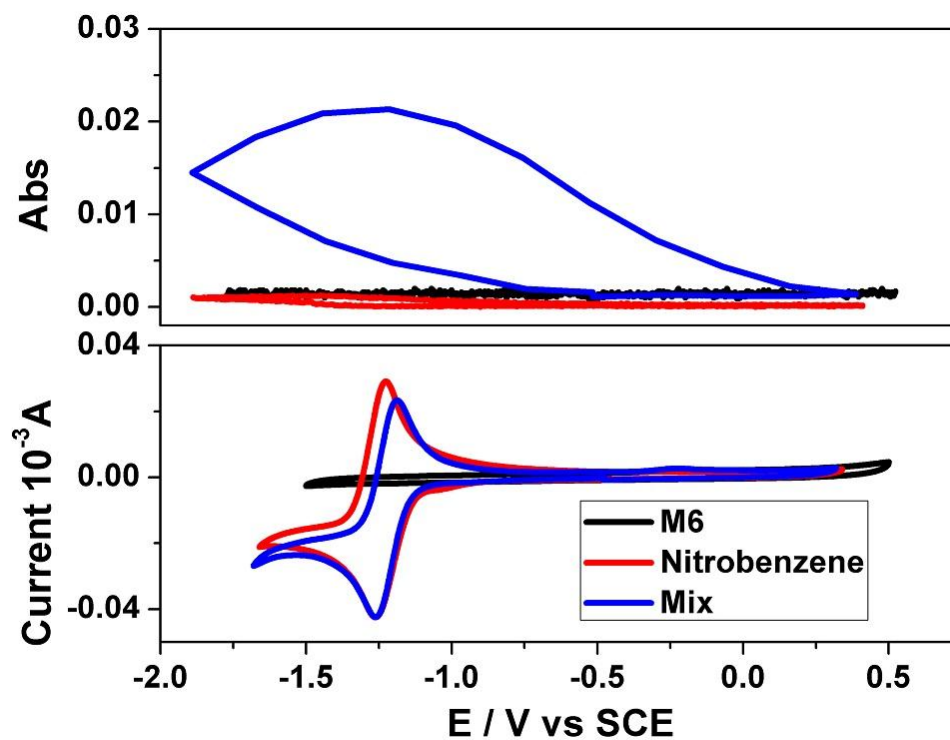

**Figure S6** Changes in absorption at 416 nm (top) and cyclic voltammograms (bottom) of M6 ( $1.0 \times 10^{-3}$  M), nitrobenzene ( $1.0 \times 10^{-3}$  M) and M7/nitrobenzene ( $1.0 \times 10^{-3}$  M/ $1.0 \times 10^{-3}$  M), in acetonitrile with 0.1 M TBAPF6 on glassy carbon electrode ( $d = 3$  mm). Scan rate: 50 mV/s.

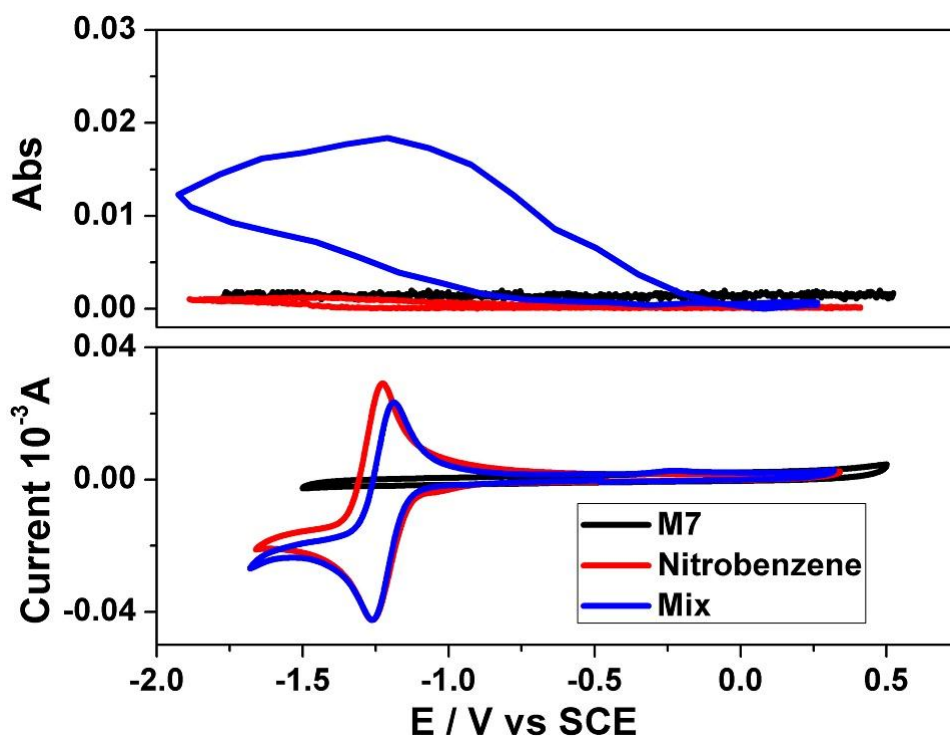

**Figure S7** Changes in absorption at 389 nm (top) and cyclic voltammograms (bottom) of M7 ( $1.0 \times 10^{-3}$  M), nitrobenzene ( $1.0 \times 10^{-3}$  M) and M7/nitrobenzene ( $1.0 \times 10^{-3}$  M/ $1.0 \times 10^{-3}$  M), in acetonitrile with 0.1 M TBAPF6 on glassy carbon electrode ( $d = 3$  mm). Scan rate: 50 mV/s.

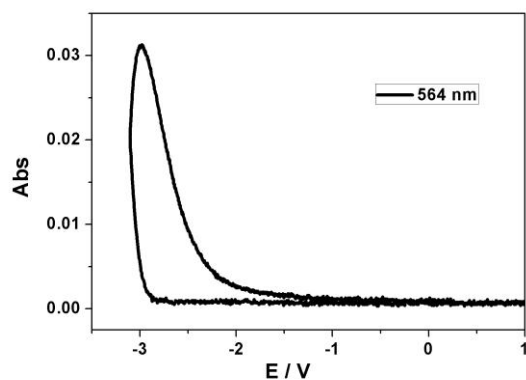

**Figure S8** Cyclic voltammogram (CV) of the liquid device of **M1**. From this CV, we choose -3.0 V as turn-on voltage for the liquid device and 2.0 V as turn-off voltage.

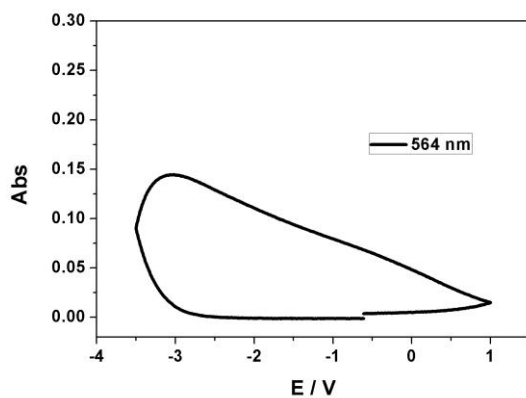

**Figure S9** Cyclic voltammogram (CV) of the solid device of **M1**. From this CV, we choose -3.5 V as turn-on voltage for the solid device and 2.0 V as turn-off voltage.

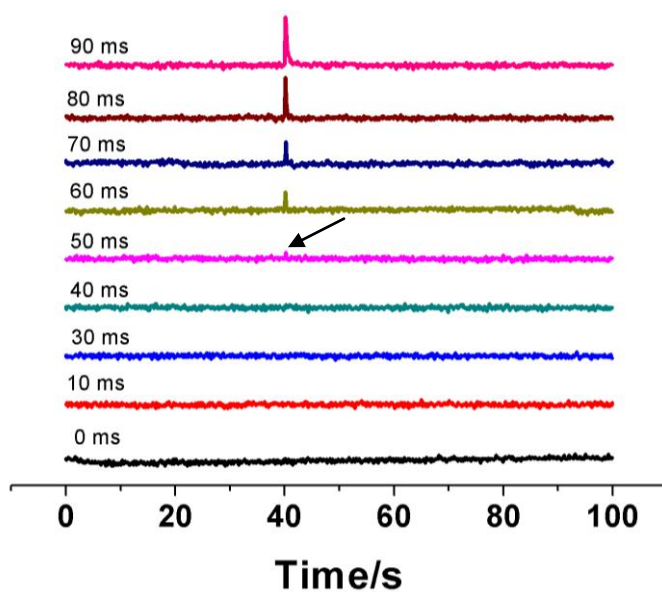

**Figure S10.** Variation of absorbance of **M1** at 564 nm with time. Impulse voltages of -3.0 V were applied at 40 s and the impulse times were from 0 ms to 90 ms. An absorbance change is observed at the impulse of 50 ms as labeled with arrow).

### 3. Absorption spectra and cyclic voltammogram of M2-M7

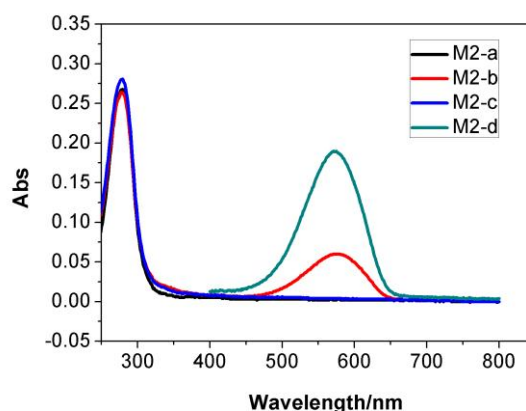

**Figure S11 (a).** Absorption spectra of **M2** ( $1.0 \times 10^{-5}$  M) in acetonitrile (black curve), treated with potassium tert-butoxide (red curve), then neutralized with  $\text{CH}_3\text{COOH}$  (blue curve). Absorption spectrum of **M2** ( $1.0 \times 10^{-3}$  M) in acetonitrile containing  $\text{TBAPF}_6$  (0.1 M) under -3.0 V bias in ITO device (green curve).

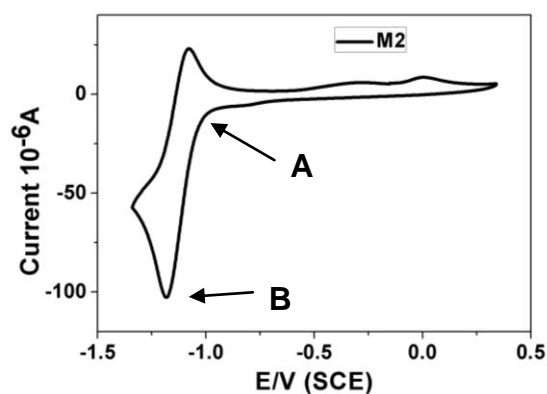

**Figure S11 (b).** Cyclic voltammogram (CV) of **M2** ( $1.0 \times 10^{-3}$  M) in acetonitrile containing  $\text{TBAPF}_6$  (0.1 M). Scan rate: 100 mV/s. The switch threshold of **M2** is labeled with arrow A and the oxidation peak of carbonyl group is labeled with arrow B.

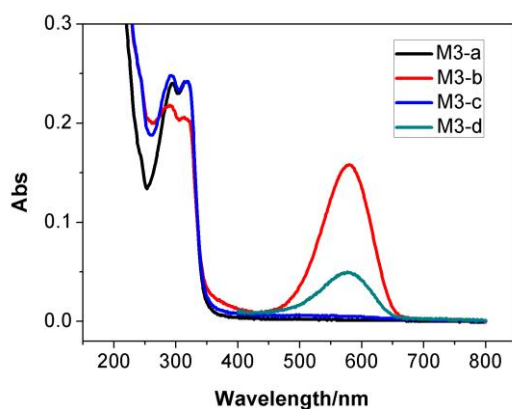

**Figure S12 (a).** Absorption spectra of **M3** ( $1.0 \times 10^{-5}$  M) in acetonitrile (black curve), treated with potassium tert-butoxide (red curve), then neutralized with  $\text{CH}_3\text{COOH}$  (blue curve). Absorption spectrum of **M3** ( $1.0 \times 10^{-3}$  M) in acetonitrile containing  $\text{TBAPF}_6$  (0.1 M) under -3.0 V bias in ITO device (green curve).

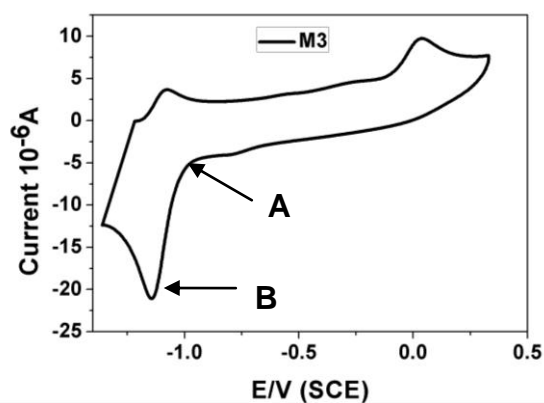

**Figure S12 (b).** Cyclic voltammogram (CV) of **M3** ( $1.0 \times 10^{-3}$  M) in acetonitrile containing  $\text{TBAPF}_6$  (0.1 M). Scan rate: 100 mV/s. The switch threshold of **M3** is labeled with arrow A and the oxidation peak of carbonyl group is labeled with arrow B.

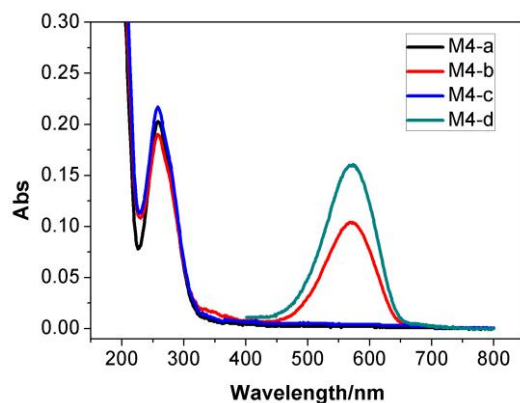

**Figure S13 (a).** Absorption spectra of **M4** ( $1.0 \times 10^{-5}$  M) in acetonitrile (black curve), treated with potassium tert-butoxide (red curve), then neutralized with  $\text{CH}_3\text{COOH}$  (blue curve). Absorption spectrum of **M4** ( $1.0 \times 10^{-3}$  M) in acetonitrile containing  $\text{TBAPF}_6$  (0.1 M) under -3.0 V bias in ITO device (green curve).

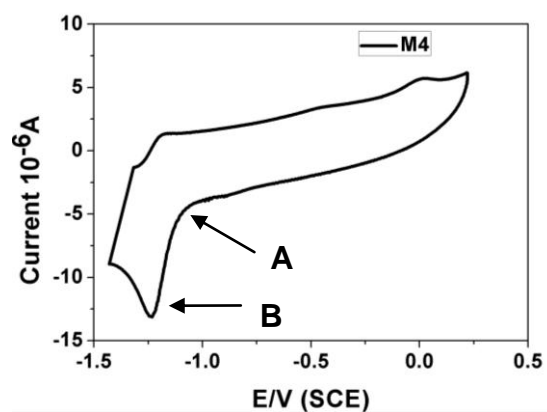

**Figure S13 (b).** Cyclic voltammogram (CV) of **M4** ( $1.0 \times 10^{-3}$  M) in acetonitrile containing  $\text{TBAPF}_6$  (0.1 M). Scan rate: 100 mV/s. The switch threshold of **M4** is labeled with arrow A and the oxidation peak of carbonyl group is labeled with arrow B.



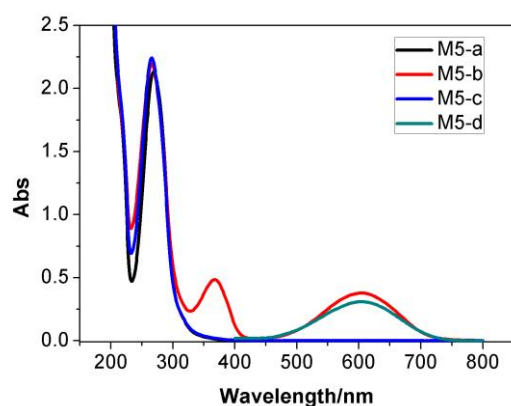

**Figure S14 (a).** Absorption spectra of **M5** ( $1.0 \times 10^{-5}$  M) in acetonitrile (black curve), treated with potassium tert-butoxide (red curve), then neutralized with  $\text{CH}_3\text{COOH}$  (blue curve). Absorption spectrum of **M5** ( $1.0 \times 10^{-3}$  M) in acetonitrile containing  $\text{TBAPF}_6$  (0.1 M) under -3.0 V bias in ITO device (green curve).

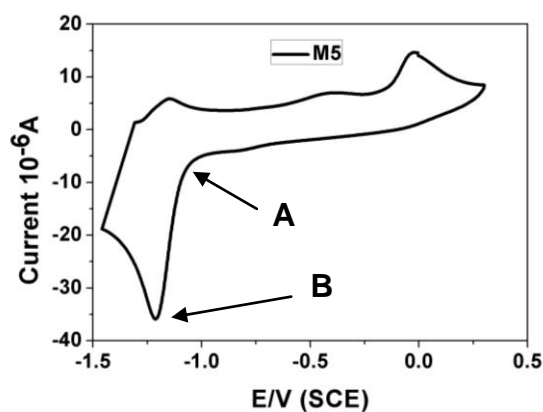

**Figure S14 (b).** Cyclic voltammogram (CV) of **M5** ( $1.0 \times 10^{-3}$  M) in acetonitrile containing  $\text{TBAPF}_6$  (0.1 M). Scan rate: 100 mV/s. The switch threshold of **M5** is labeled with arrow A and the oxidation peak of carbonyl group is labeled with arrow B.

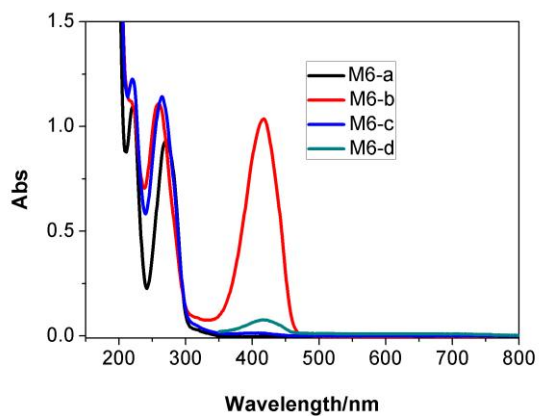

**Figure S15.** Absorption spectra of **M6** ( $1.0 \times 10^{-5}$  M) in acetonitrile (black curve), treated with potassium tert-butoxide (red curve), then neutralized with  $\text{CH}_3\text{COOH}$  (blue curve). Absorption spectrum of mixture of **M6** ( $1.0 \times 10^{-3}$  M) and nitrobenzene ( $1.0 \times 10^{-3}$  M) in acetonitrile containing  $\text{TBAPF}_6$  (0.1 M) under -3.0 V bias in ITO device (green curve).

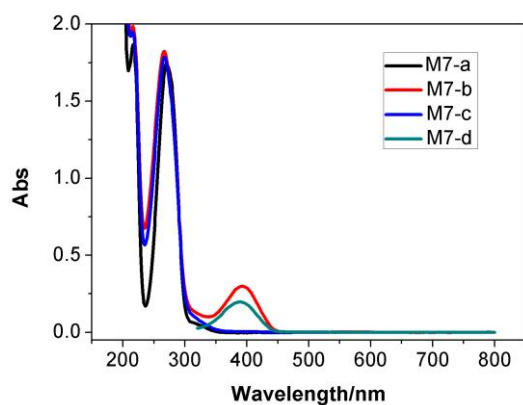

**Figure S16.** Absorption spectra of **M7** ( $1.0 \times 10^{-5}$  M) in acetonitrile (black curve), treated with potassium tert-butoxide (red curve), then neutralized with  $\text{CH}_3\text{COOH}$  (blue curve). Absorption spectrum of mixture of **M7** ( $1.0 \times 10^{-3}$  M) and nitrobenzene ( $1.0 \times 10^{-3}$  M) in acetonitrile containing  $\text{TBAPF}_6$  (0.1 M) under -3.0 V bias (green curve).

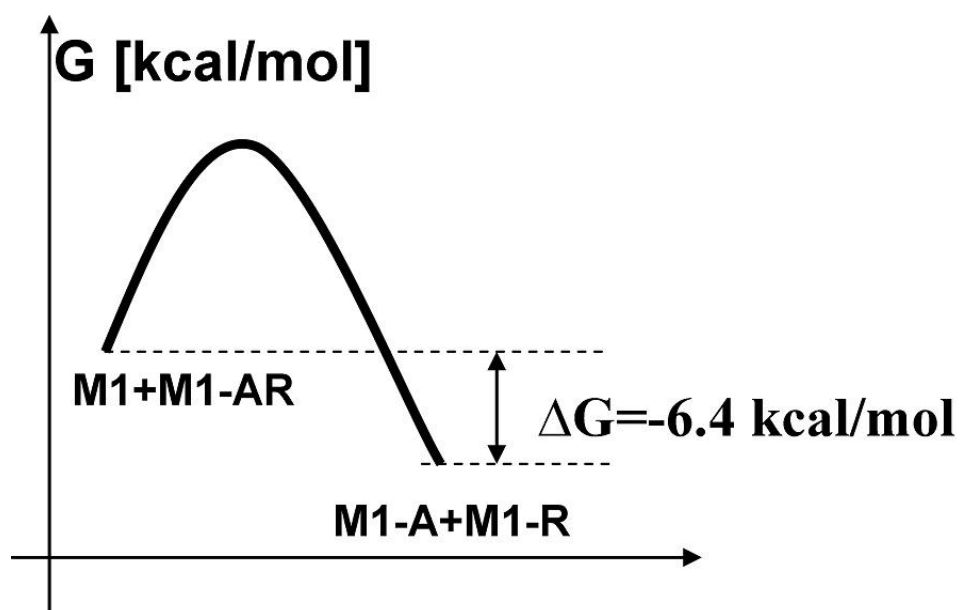

**Figure S17.** Schematic depiction of an adiabatic intermolecular proton transfer reaction. The free energy is plotted along the collective reaction coordinate, with the Gibb's free energy difference between reactant (**M1**: -820.4957 au; **M1-AR**: -820.5439 au) and product (**M1-A**: -819.9698 au; **M1-R**: -821.0801 au) denoted by  $\Delta G$ . All the calculations were performed using the B3LYP/6-31+G(d,p).<sup>[1]</sup>

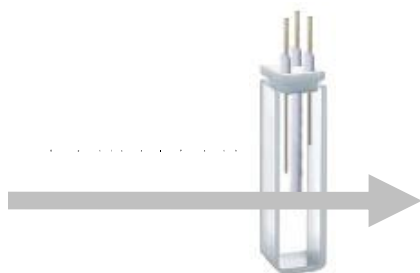

**Figure S18.** Illustration of in-situ Spectroelectrochemical Characterization

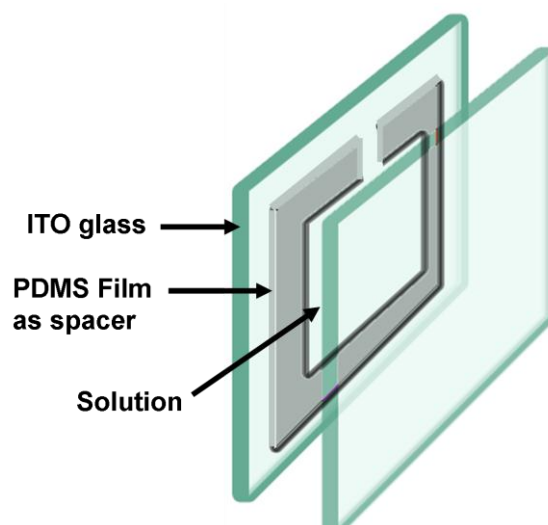

**Figure S19.** Illustration of the ITO cells of liquid film.

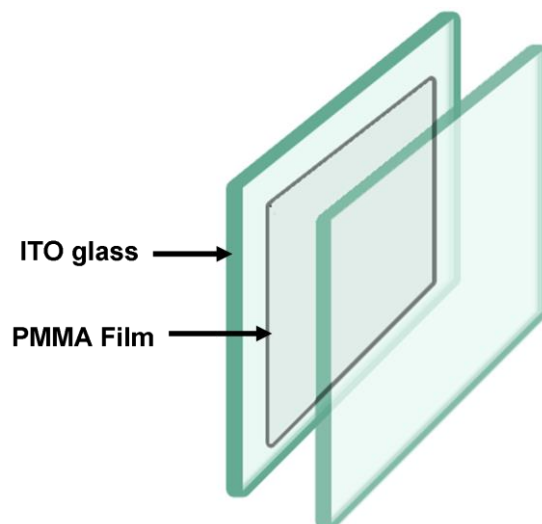

**Figure S20.** Illustration of the ITO cells of PMMA film.

## 4. $^1\text{H}$ NMR and $^{13}\text{C}$ NMR of M1-M8

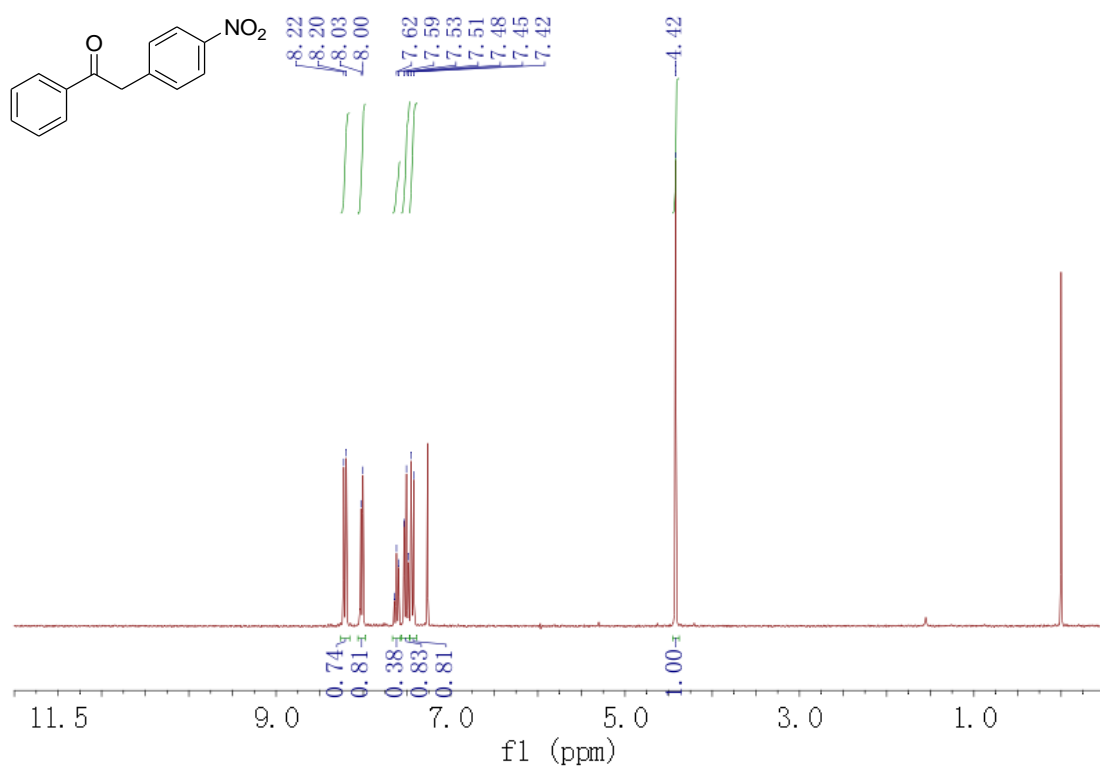

$^1\text{H}$  NMR (300 MHz,  $\text{CDCl}_3$ ) of M1

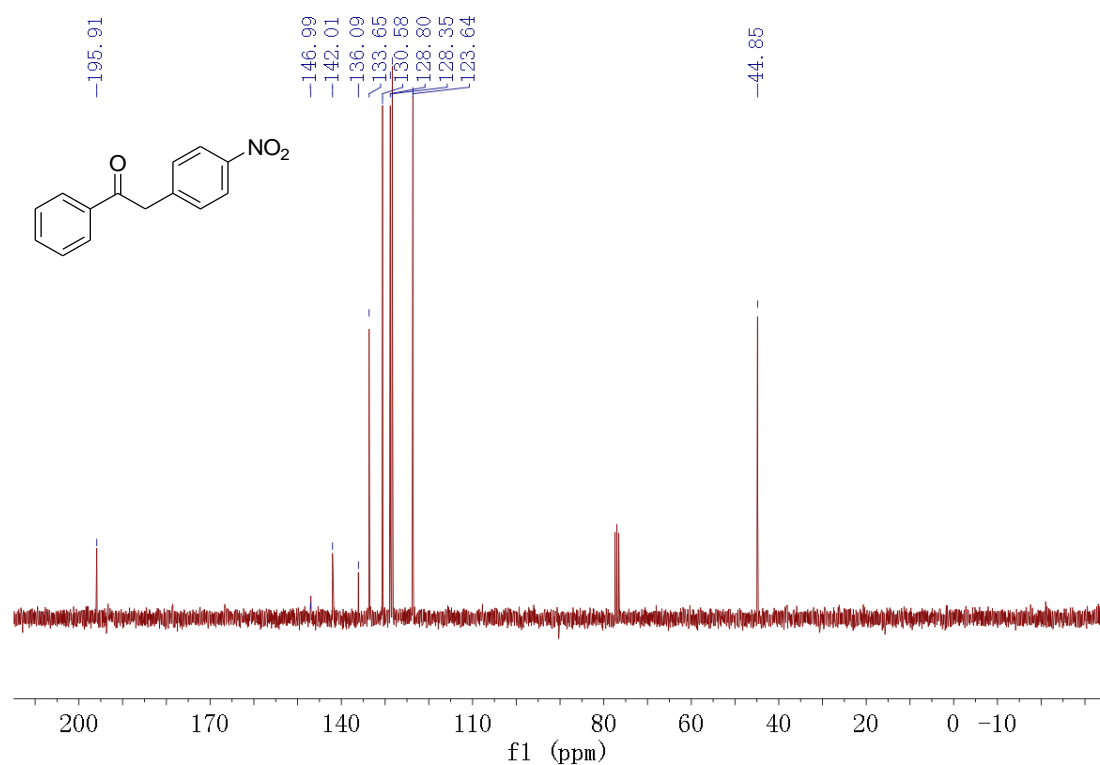

$^{13}\text{C}$  NMR (75 MHz,  $\text{CDCl}_3$ ) of M1

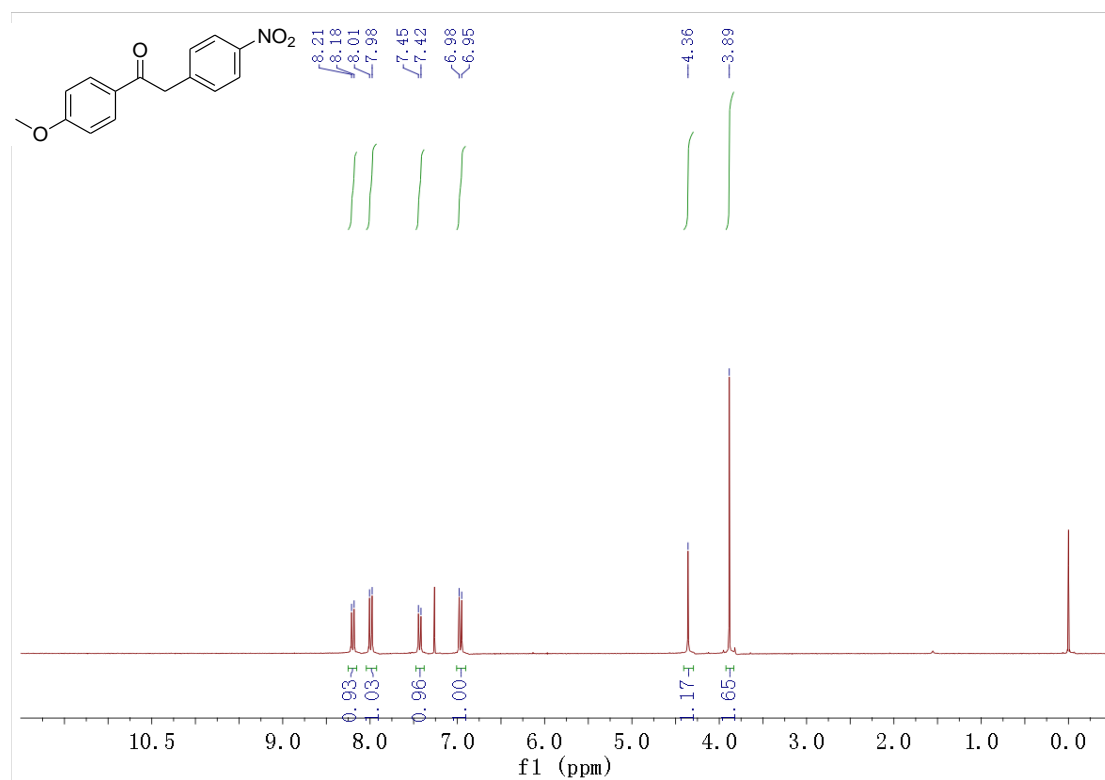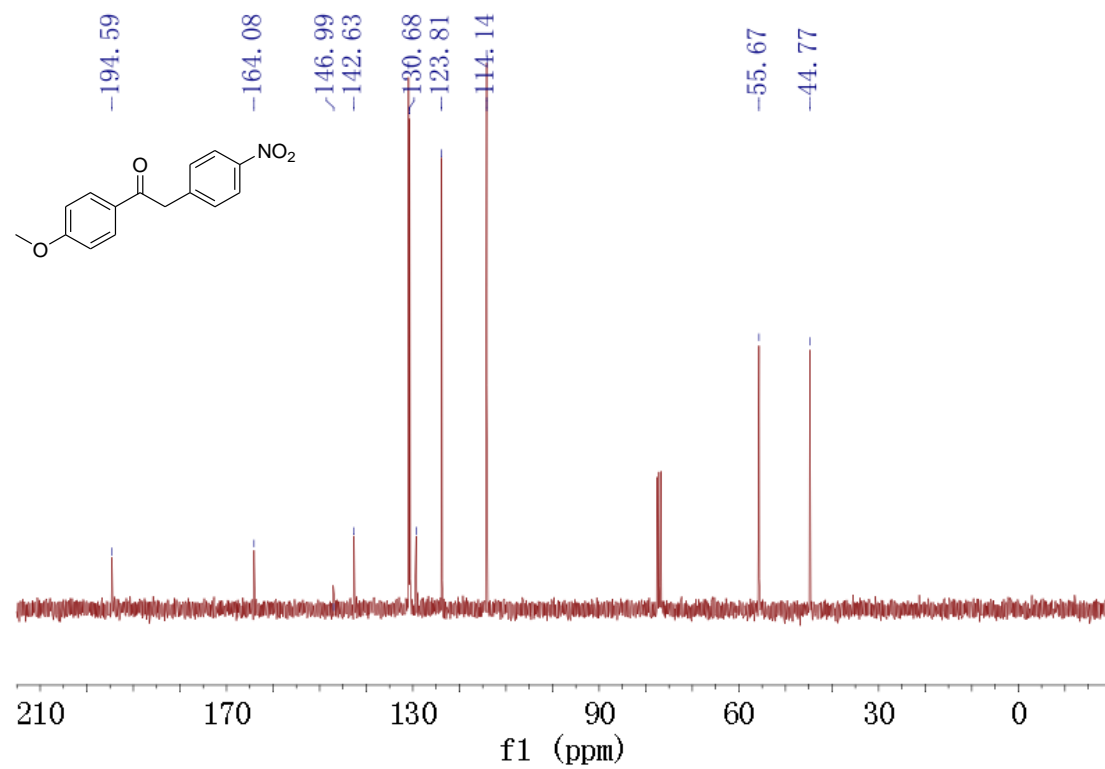

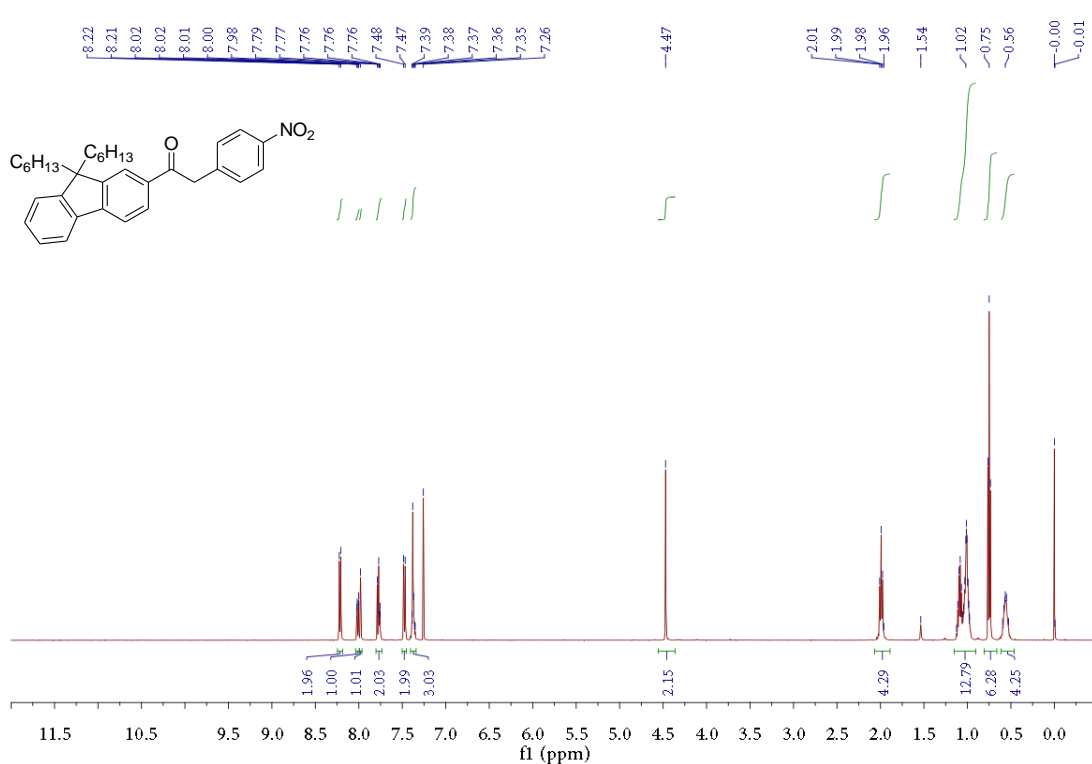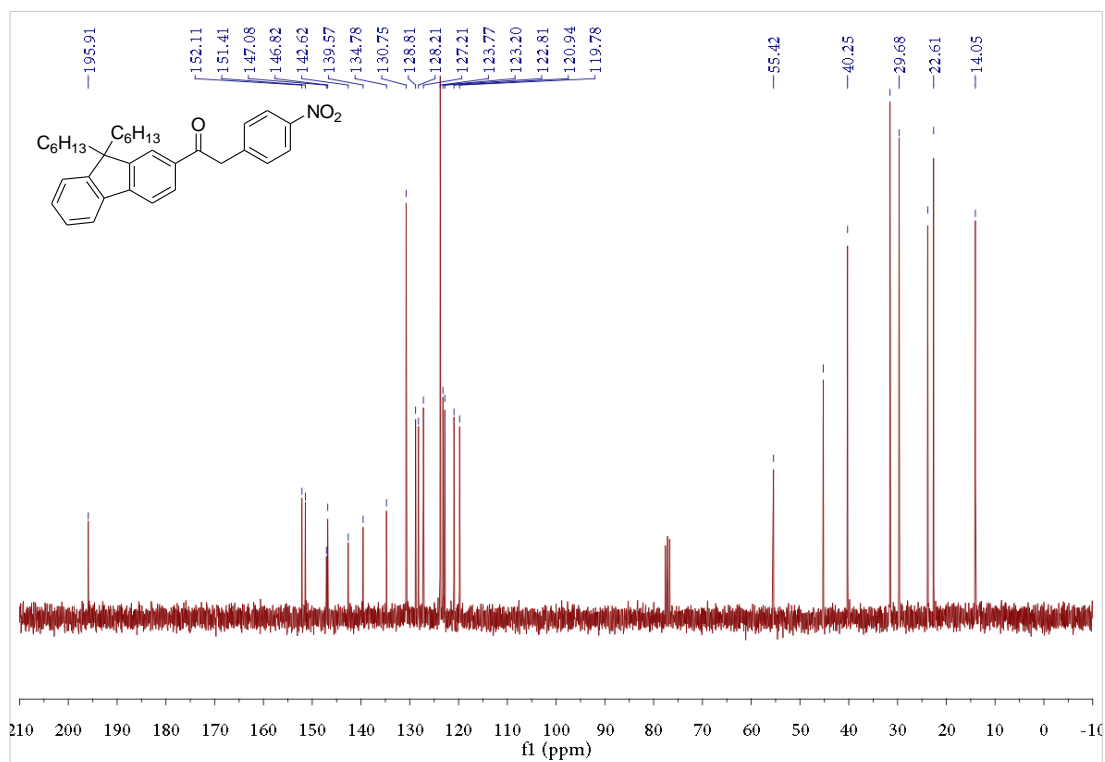



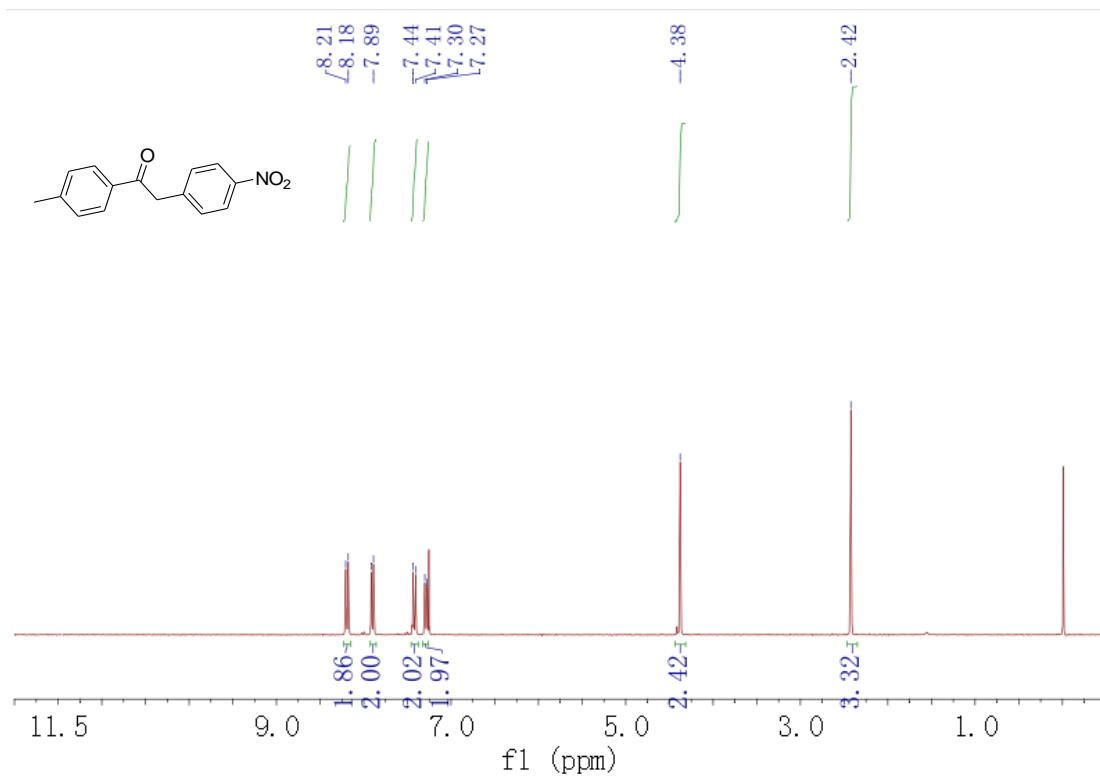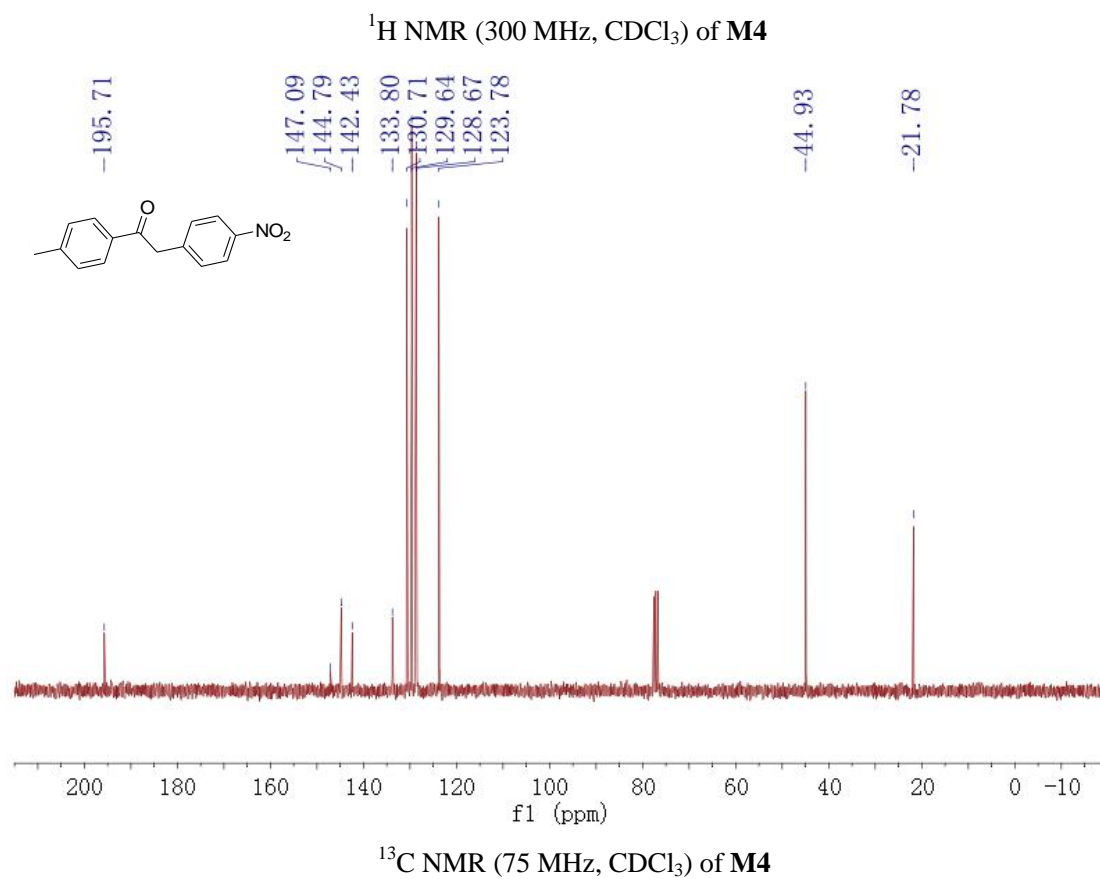

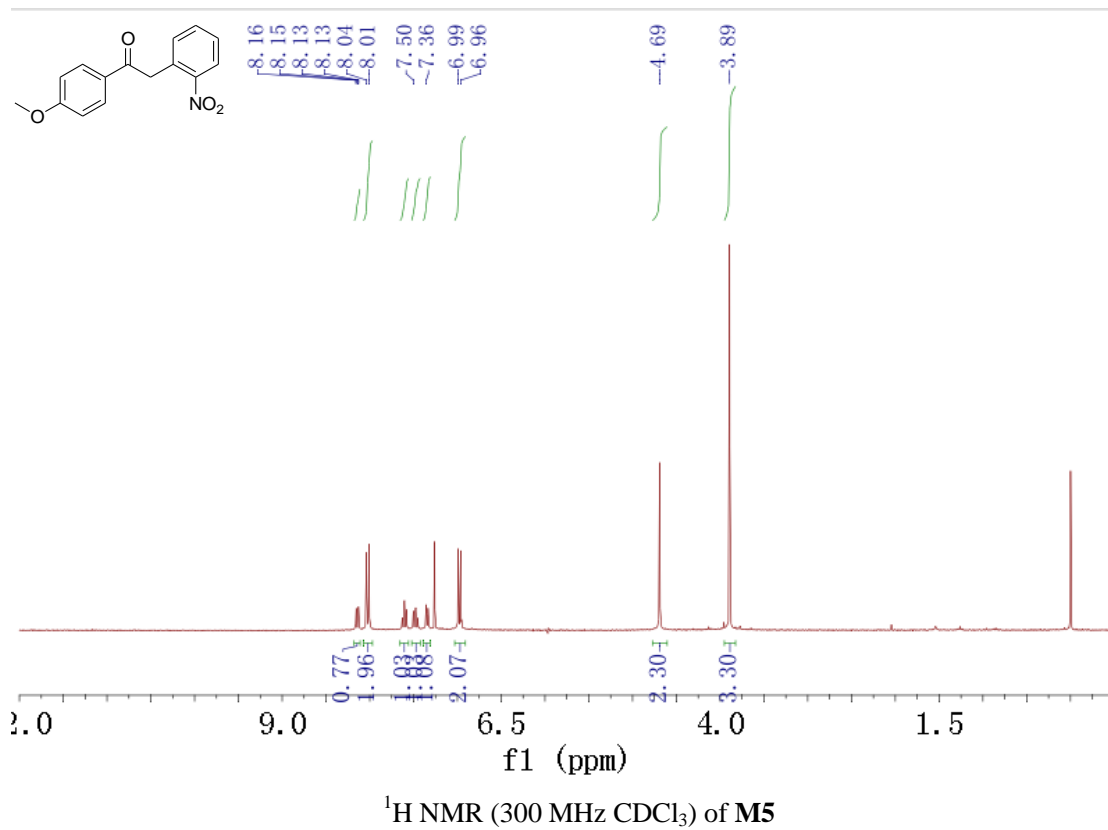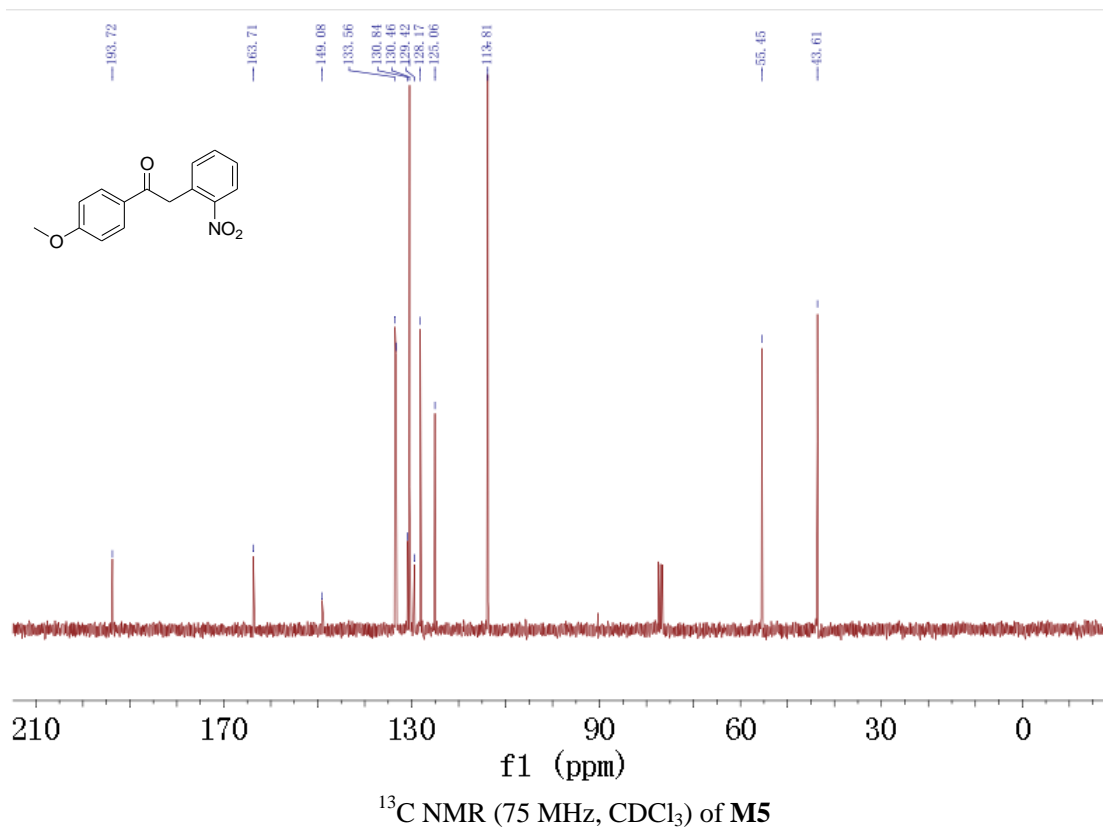

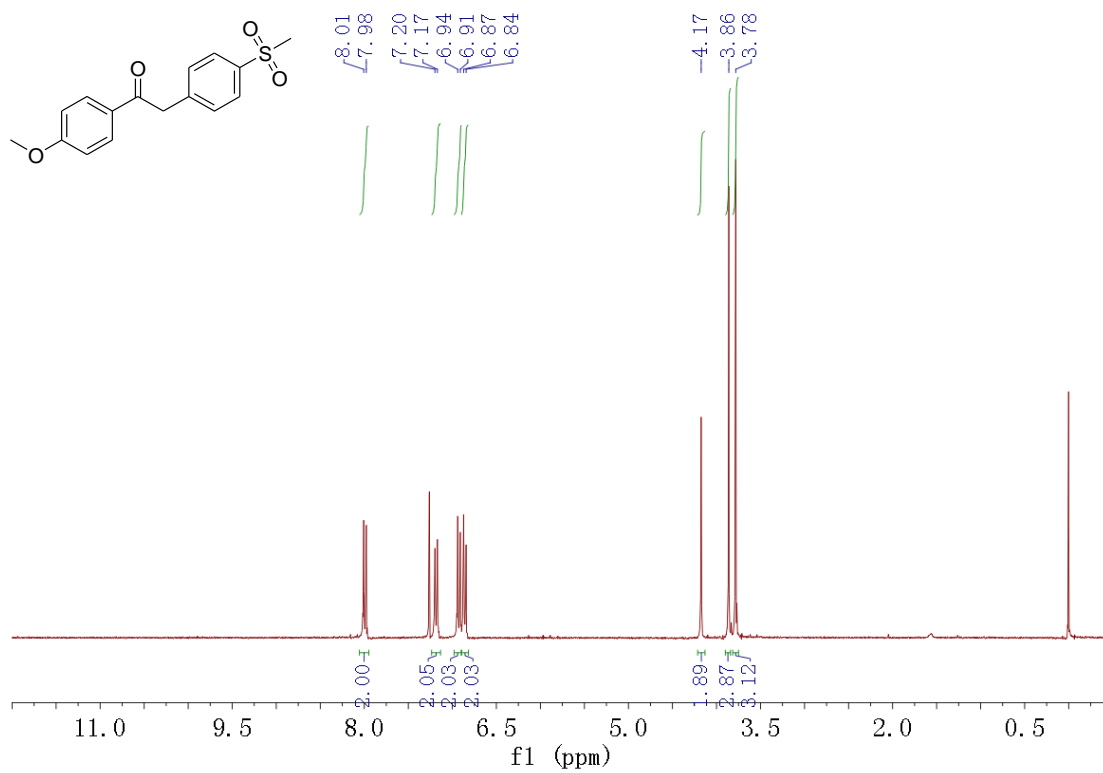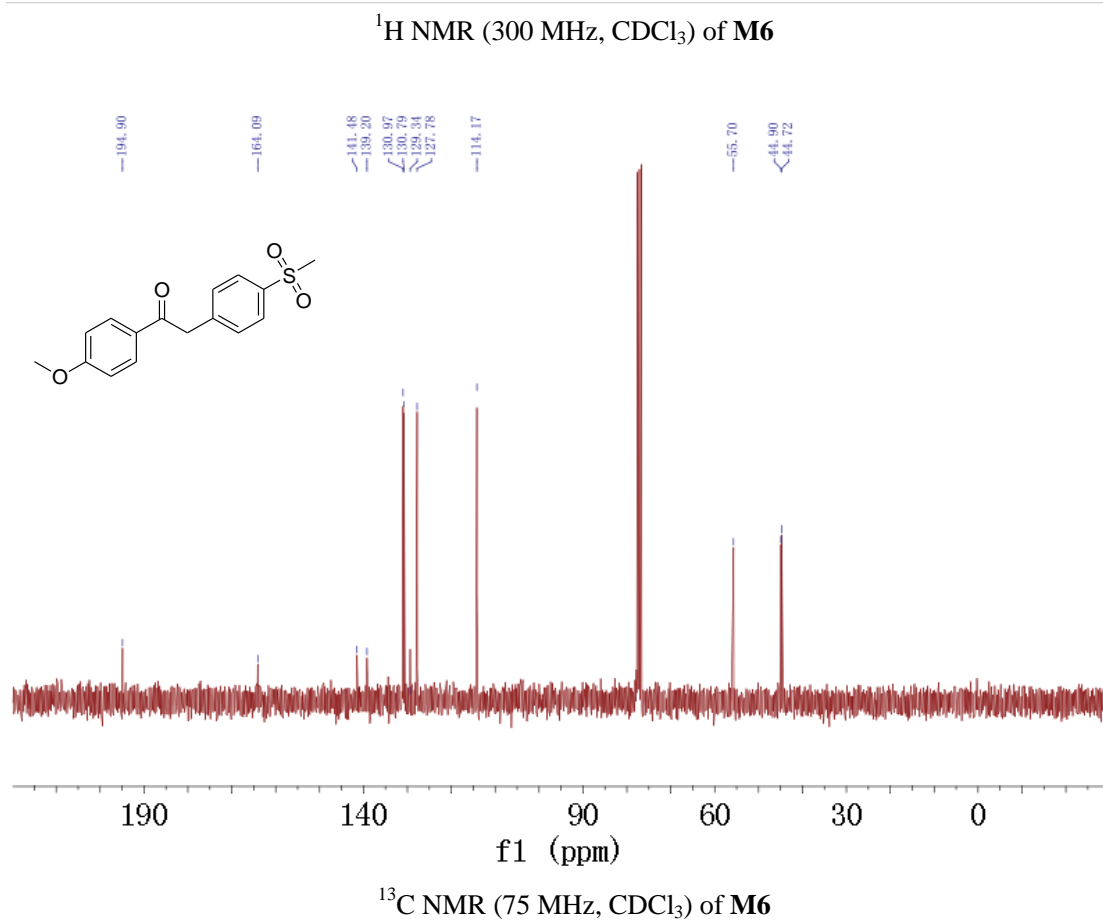

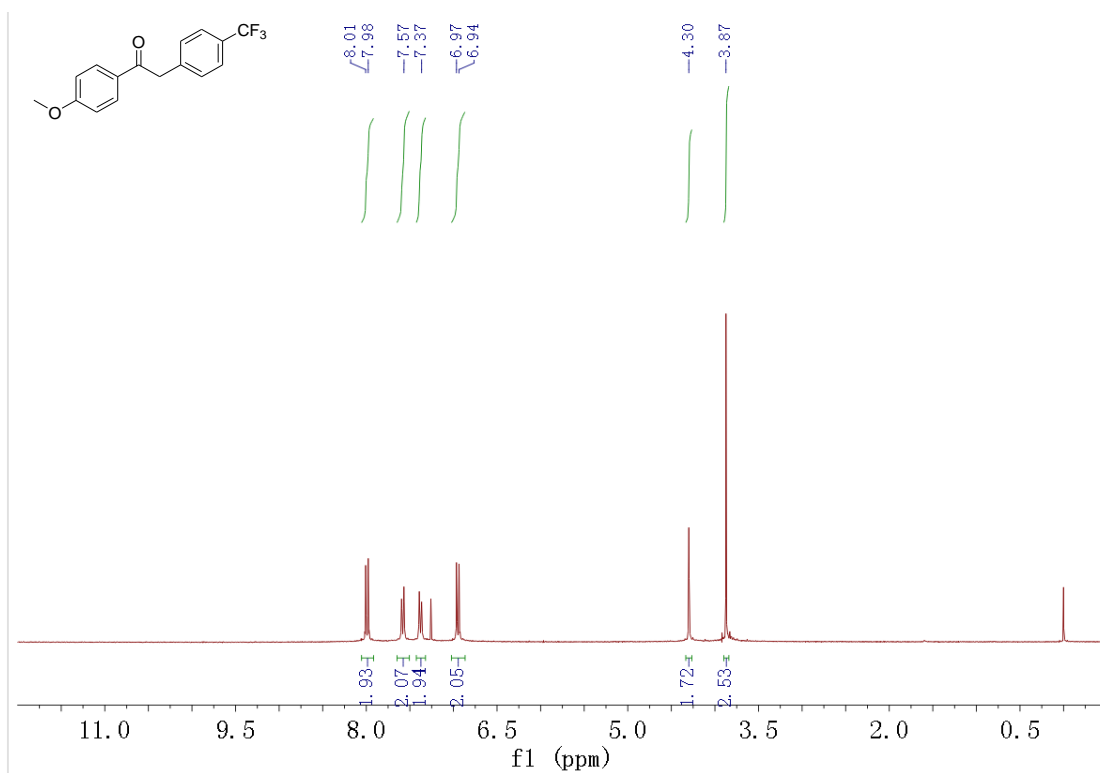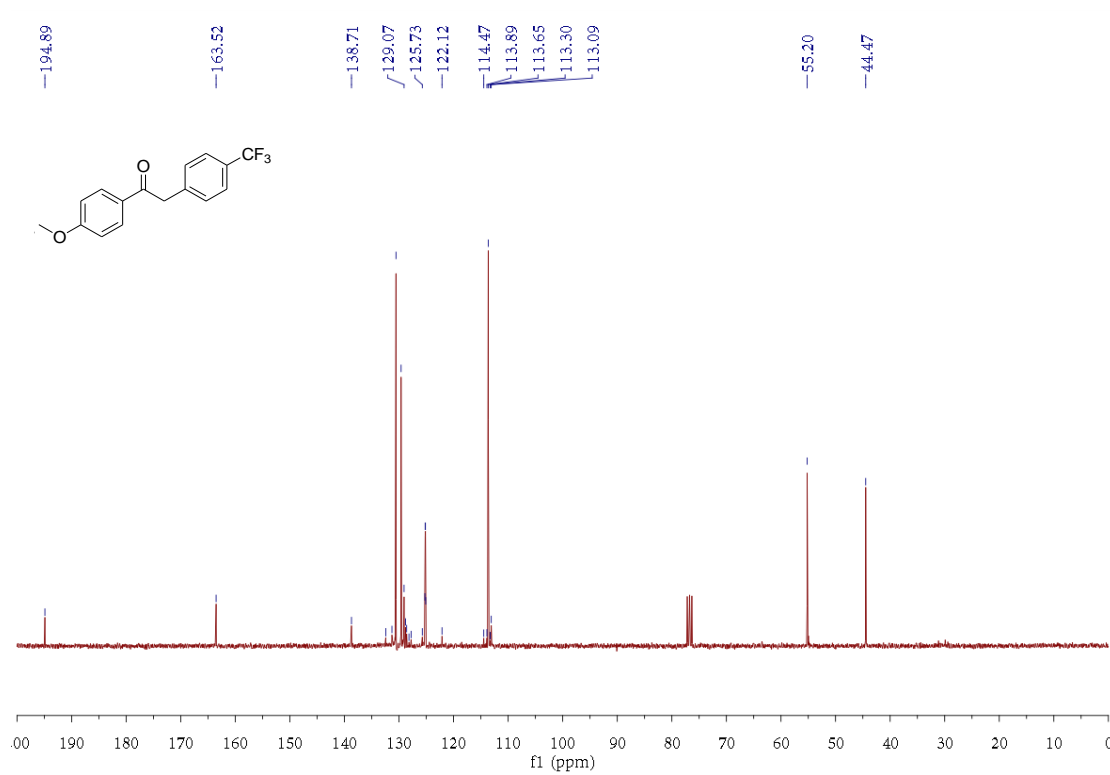

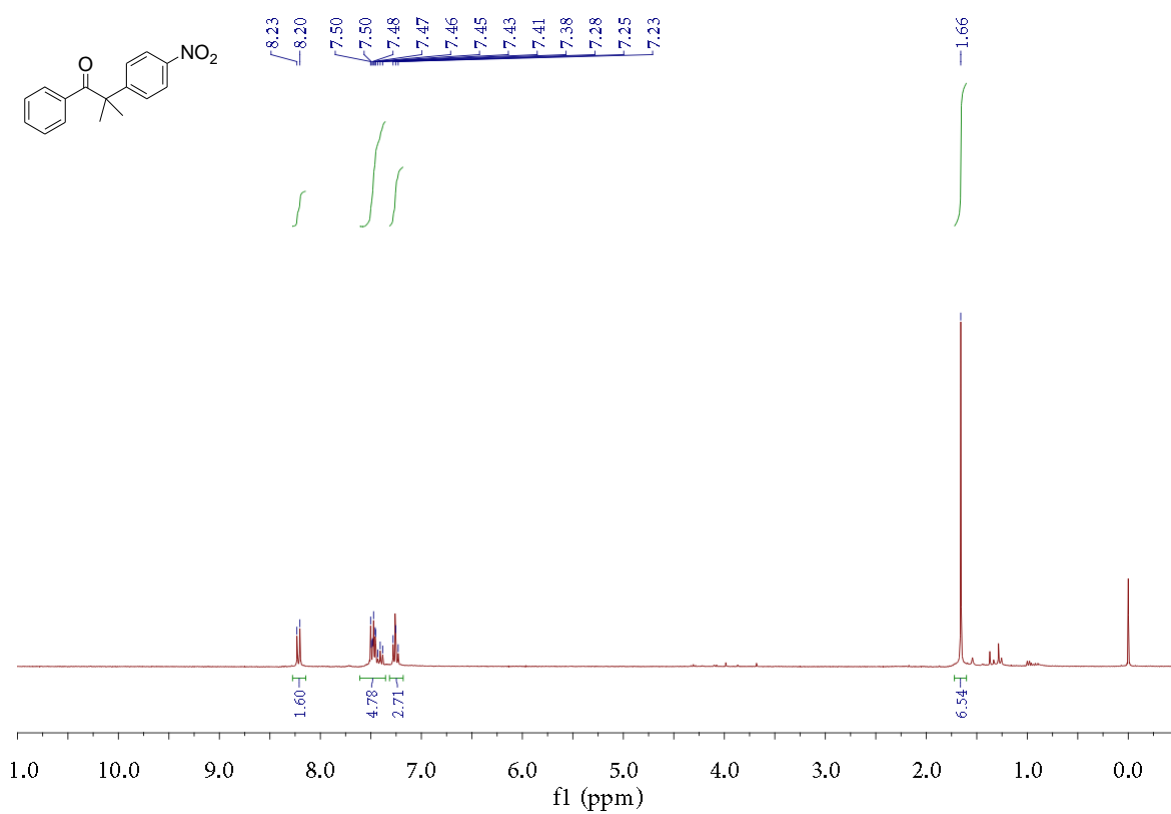

$^1\text{H NMR}$  (300 MHz,  $\text{CDCl}_3$ ) of **M9**

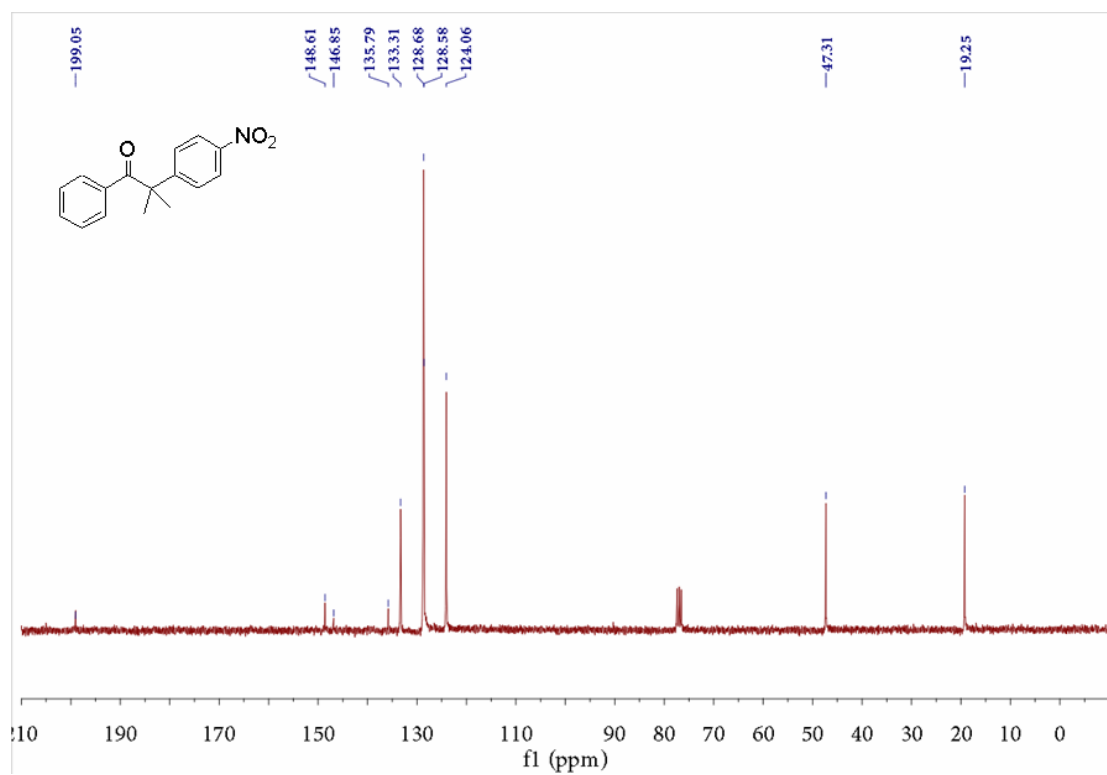

$^{13}\text{C NMR}$  (75 MHz,  $\text{CDCl}_3$ ) of **M9**

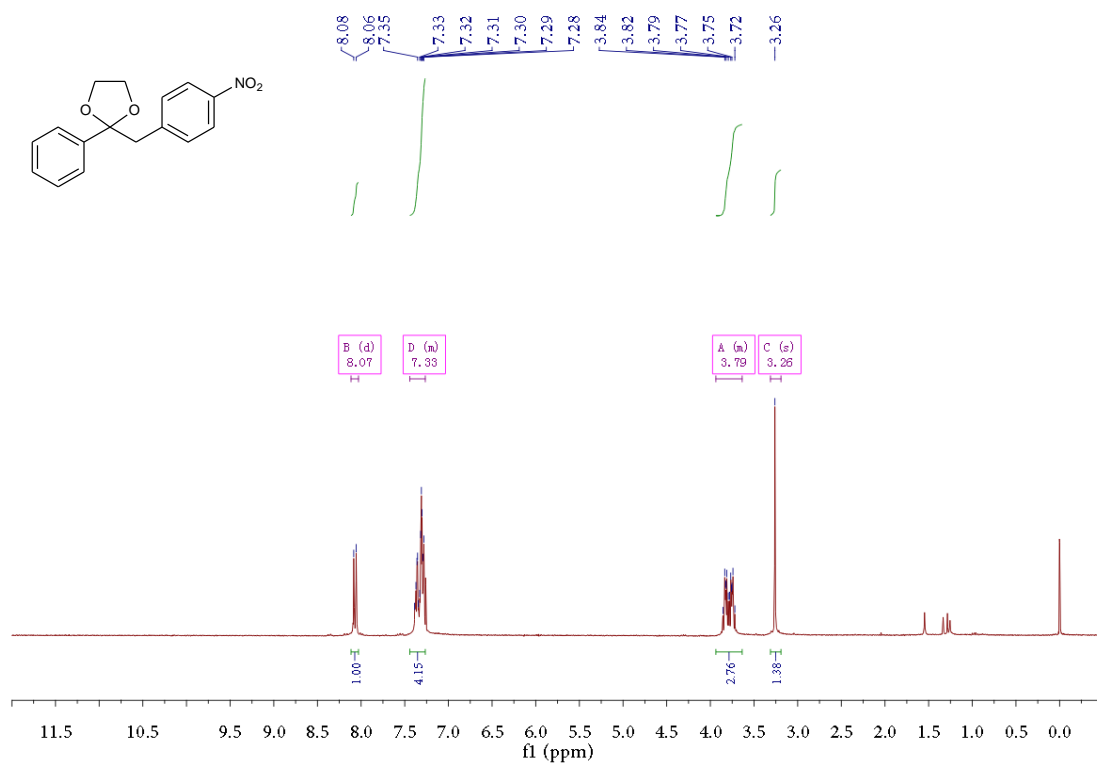

<sup>1</sup>H NMR (300 MHz, CDCl<sub>3</sub>) of M10

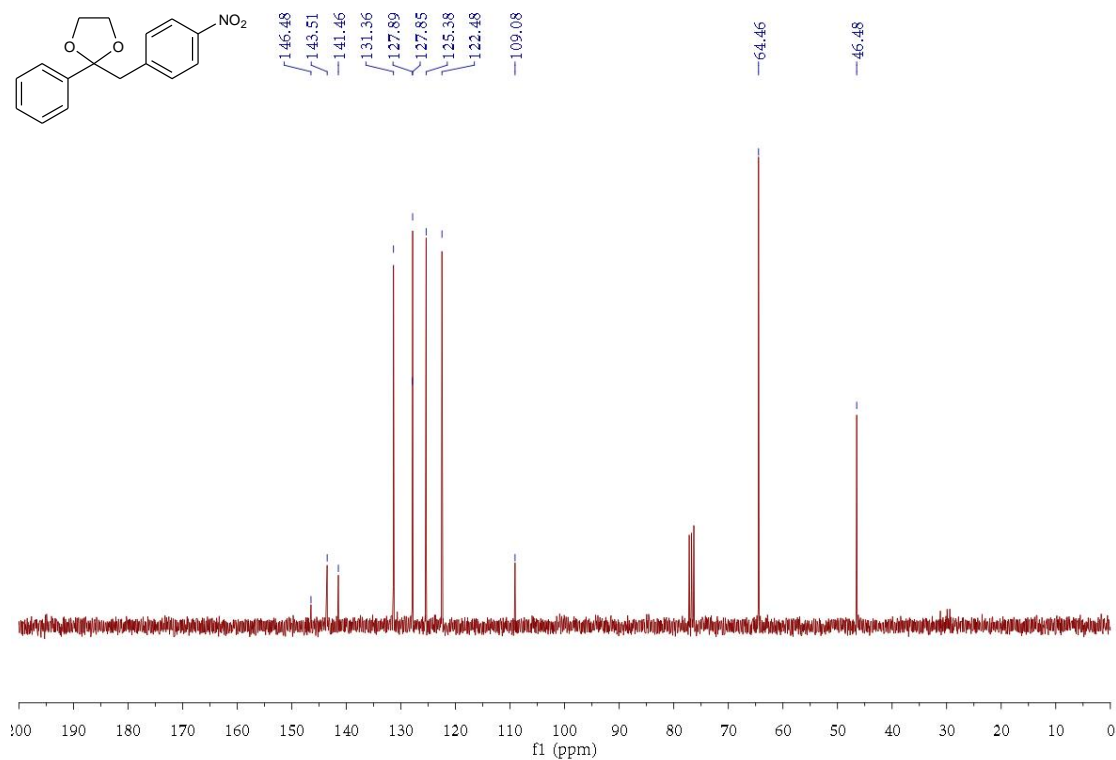

<sup>13</sup>C NMR (75 MHz, CDCl<sub>3</sub>) of M10

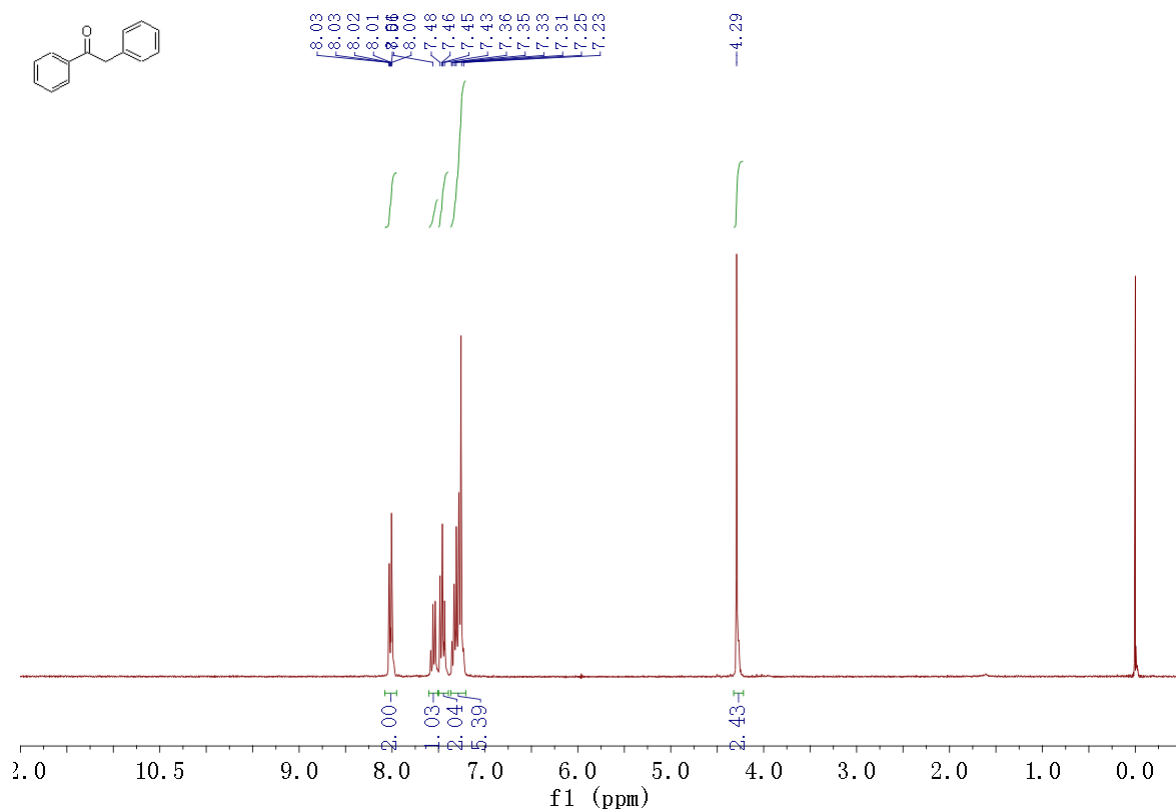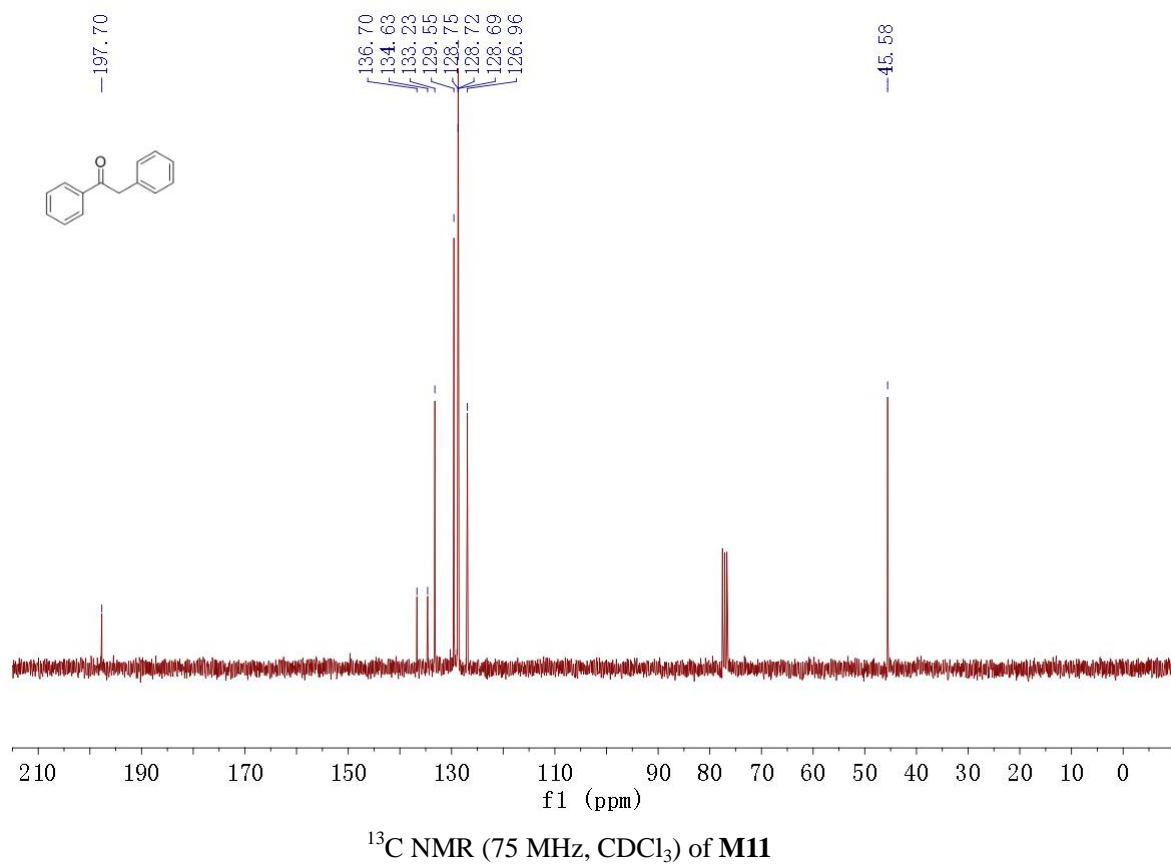

[1] M. J. Frisch, G. W. Trucks, H. B. Schlegel, G. E. Scuseria, M. A. Robb, J. R. Cheeseman, G. Scalmani, V. Barone, B. Mennucci, G. A. Petersson, H. Nakatsuji, M. Caricato, X. Li, H. P. Hratchian, A. F. Izmaylov, J. Bloino, G. Zheng, J. L. Sonnenberg, M. Hada, M. Ehara, K. Toyota, R. Fukuda, J. Hasegawa, M. Ishida, T. Nakajima, Y. Honda, O. Kitao, H. Nakai, T. Vreven, J. Montgomery, J. A. , J. E. Peralta, F. Ogliaro, M. Bearpark, J. J. Heyd, E. Brothers, K. N. Kudin, V. N. Staroverov, R. Kobayashi, J. Normand, K. Raghavachari, A. Rendell, J. C. Burant, S. S. Iyengar, J. Tomasi, M. Cossi, N. Rega, J. M. Millam, M. Klene, J. E. Knox, J. B. Cross, V. Bakken, C. Adamo, J. Jaramillo, R. Gomperts, R. E. Stratmann, O. Yazyev, A. J. Austin, R. Cammi, C. Pomelli, J. W. Ochterski, R. L. Martin, K. Morokuma, V. G. Zakrzewski, G. A. Voth, P. Salvador, J. J. Dannenberg, S. Dapprich, A. D. Daniels, O. Farkas, J. B. Foresman, J. V. Ortiz, J. Cioslowski, and D. J. Fox, *Gaussian 09, (Revision A. 02)*, Gaussian, Inc., Wallingford, CT **2009**.
